# Supplementary figures and images for: Magnetic-field-controlled positioning of magnetic domain wall in tie-shaped asymmetric nanowire and its application for magnetic field detection
Source: Royal Society of Chemistry journal article supplement (doi:10.1039/d4cp01262c), 2024-01-01

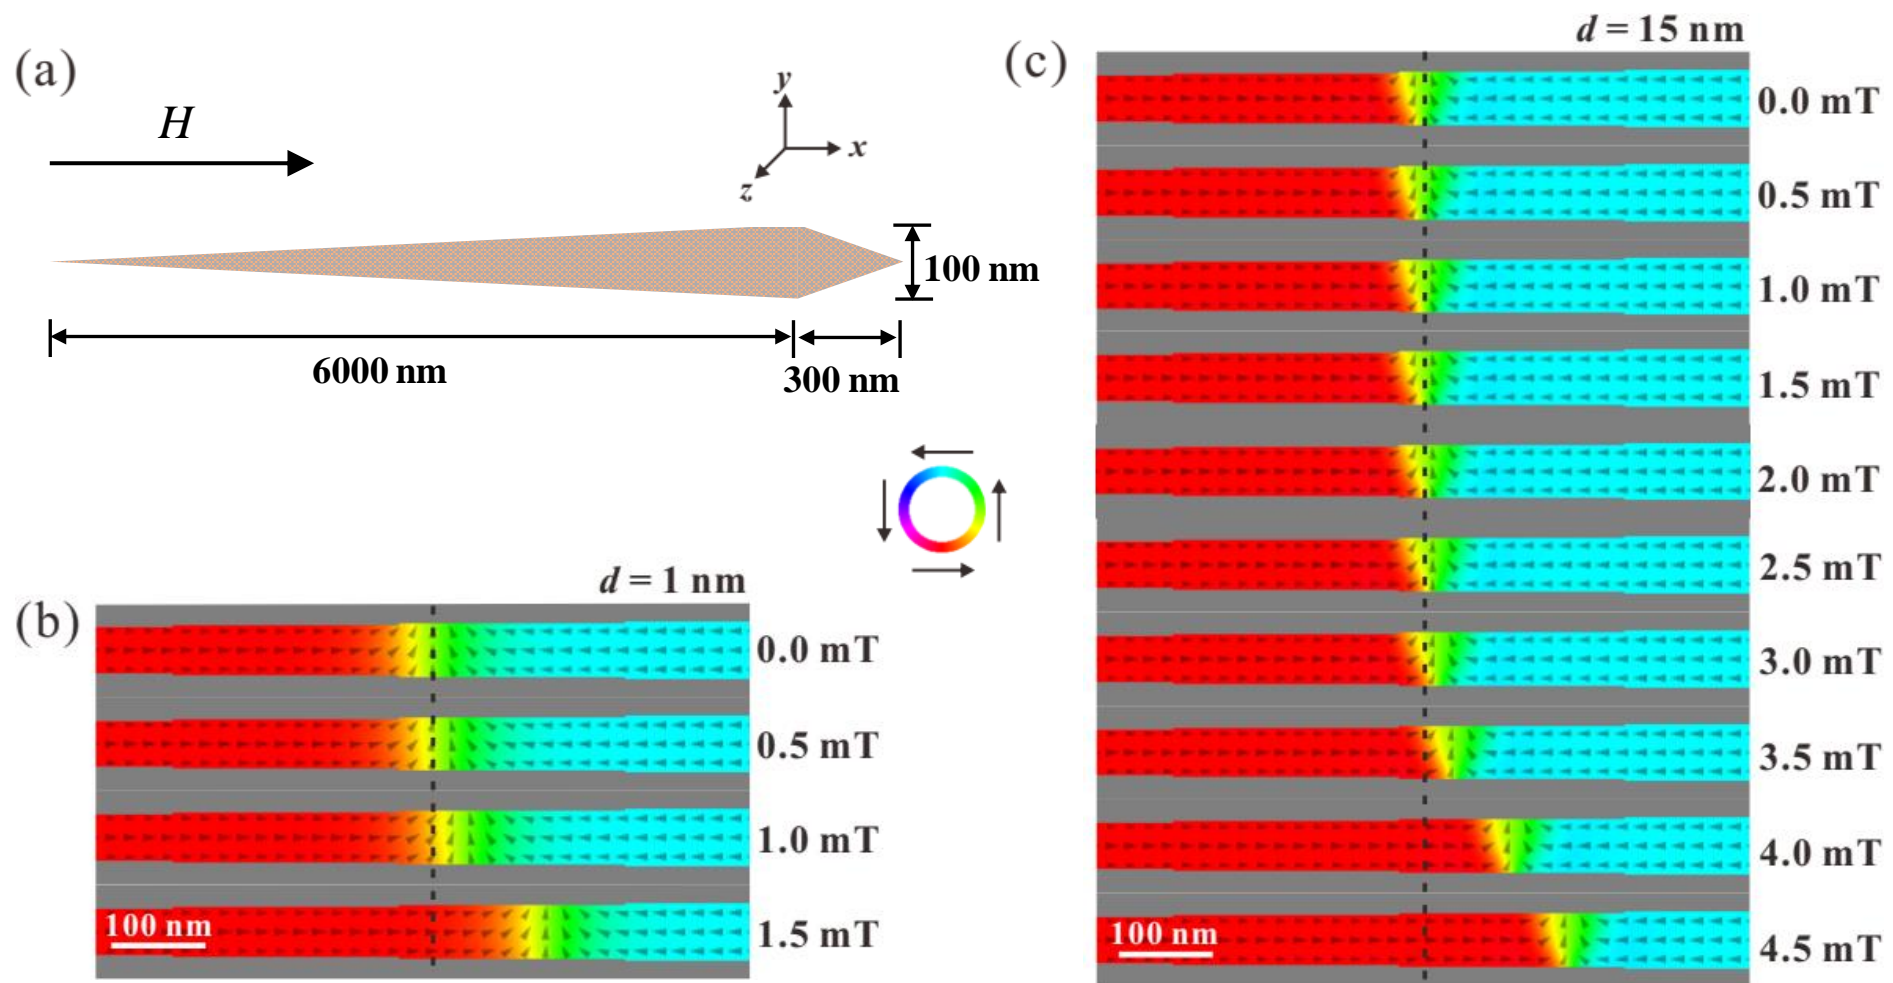

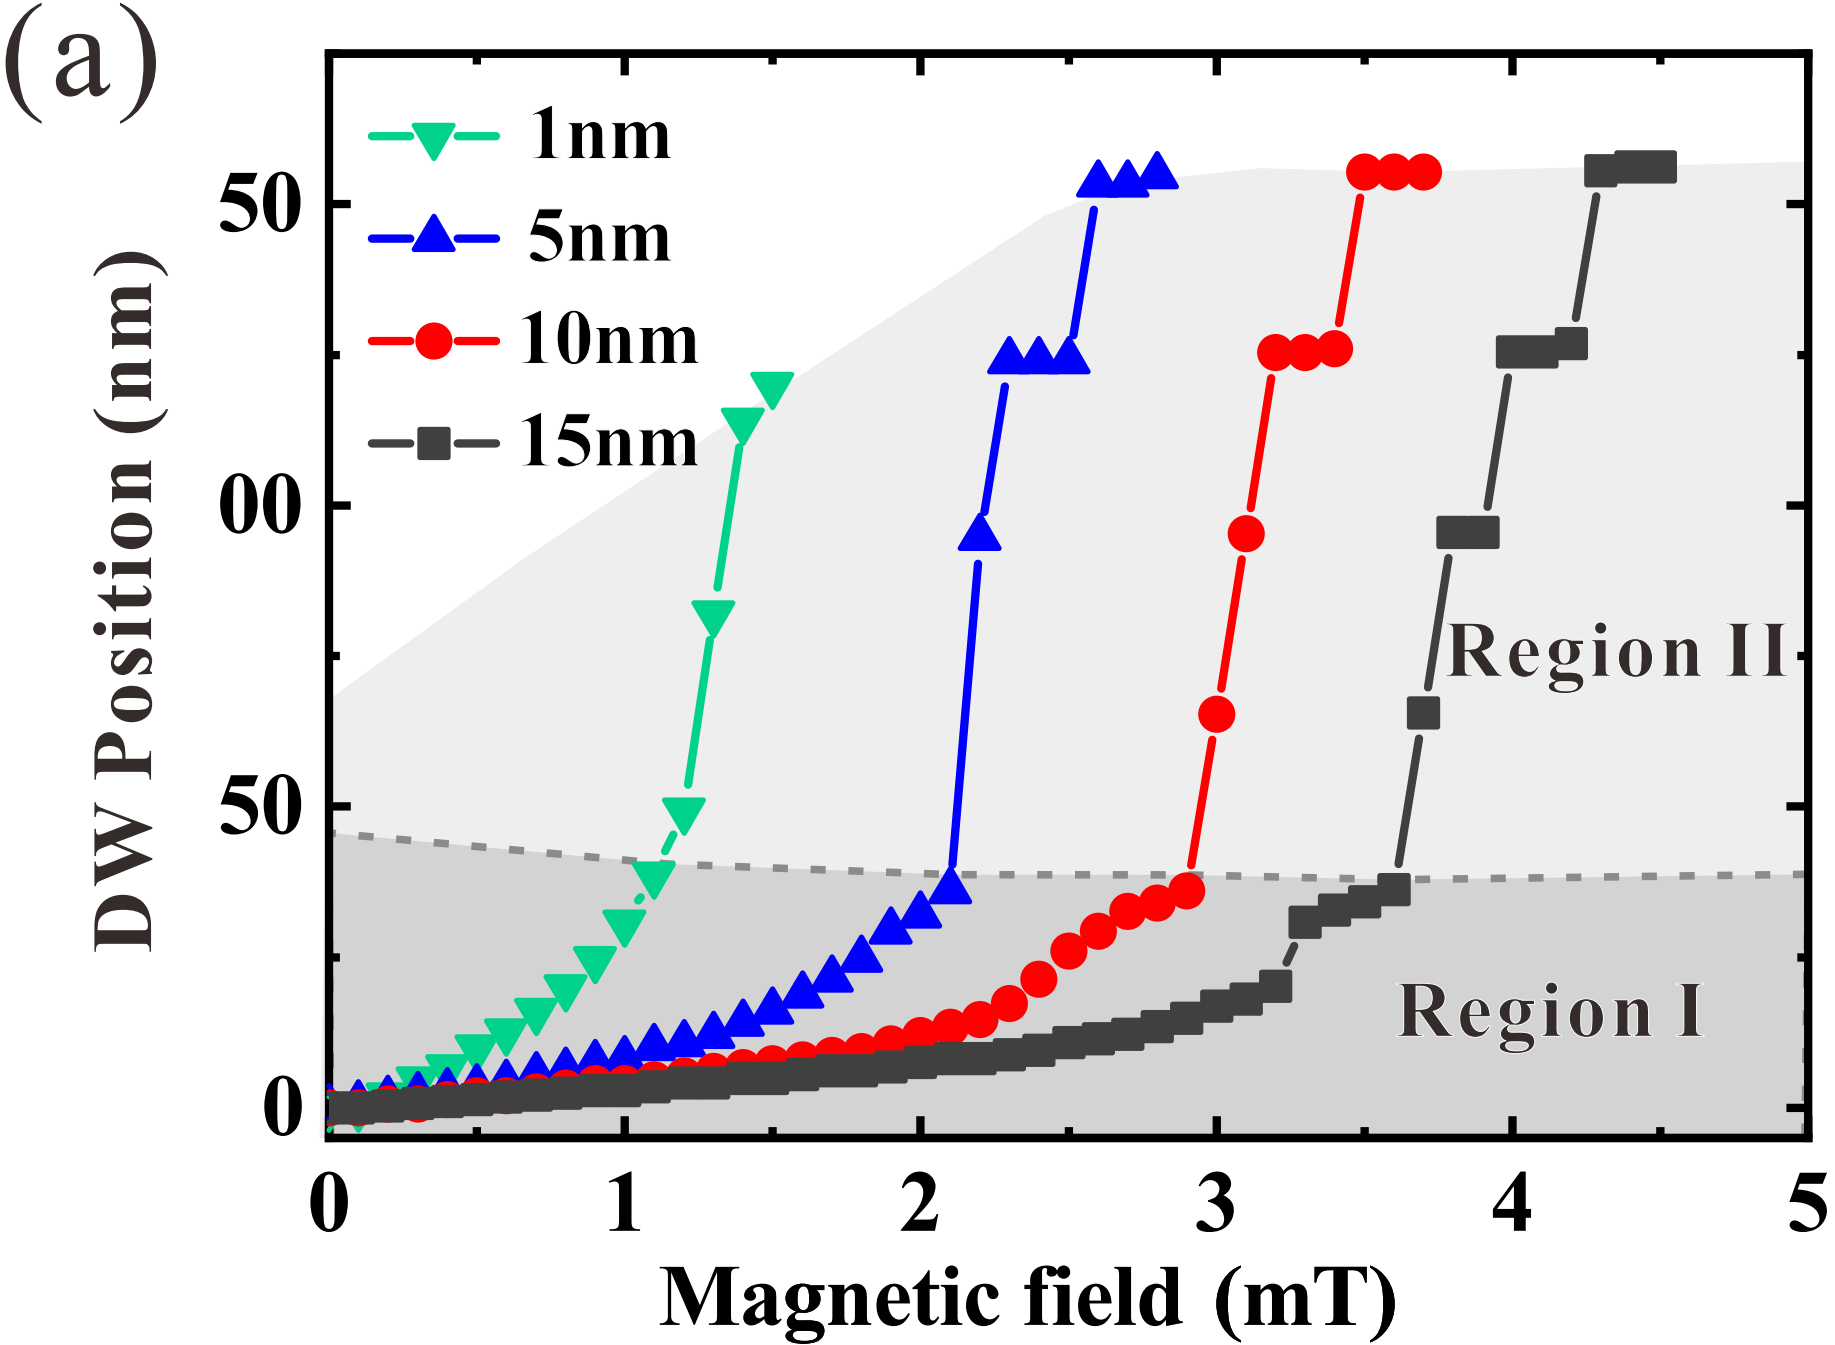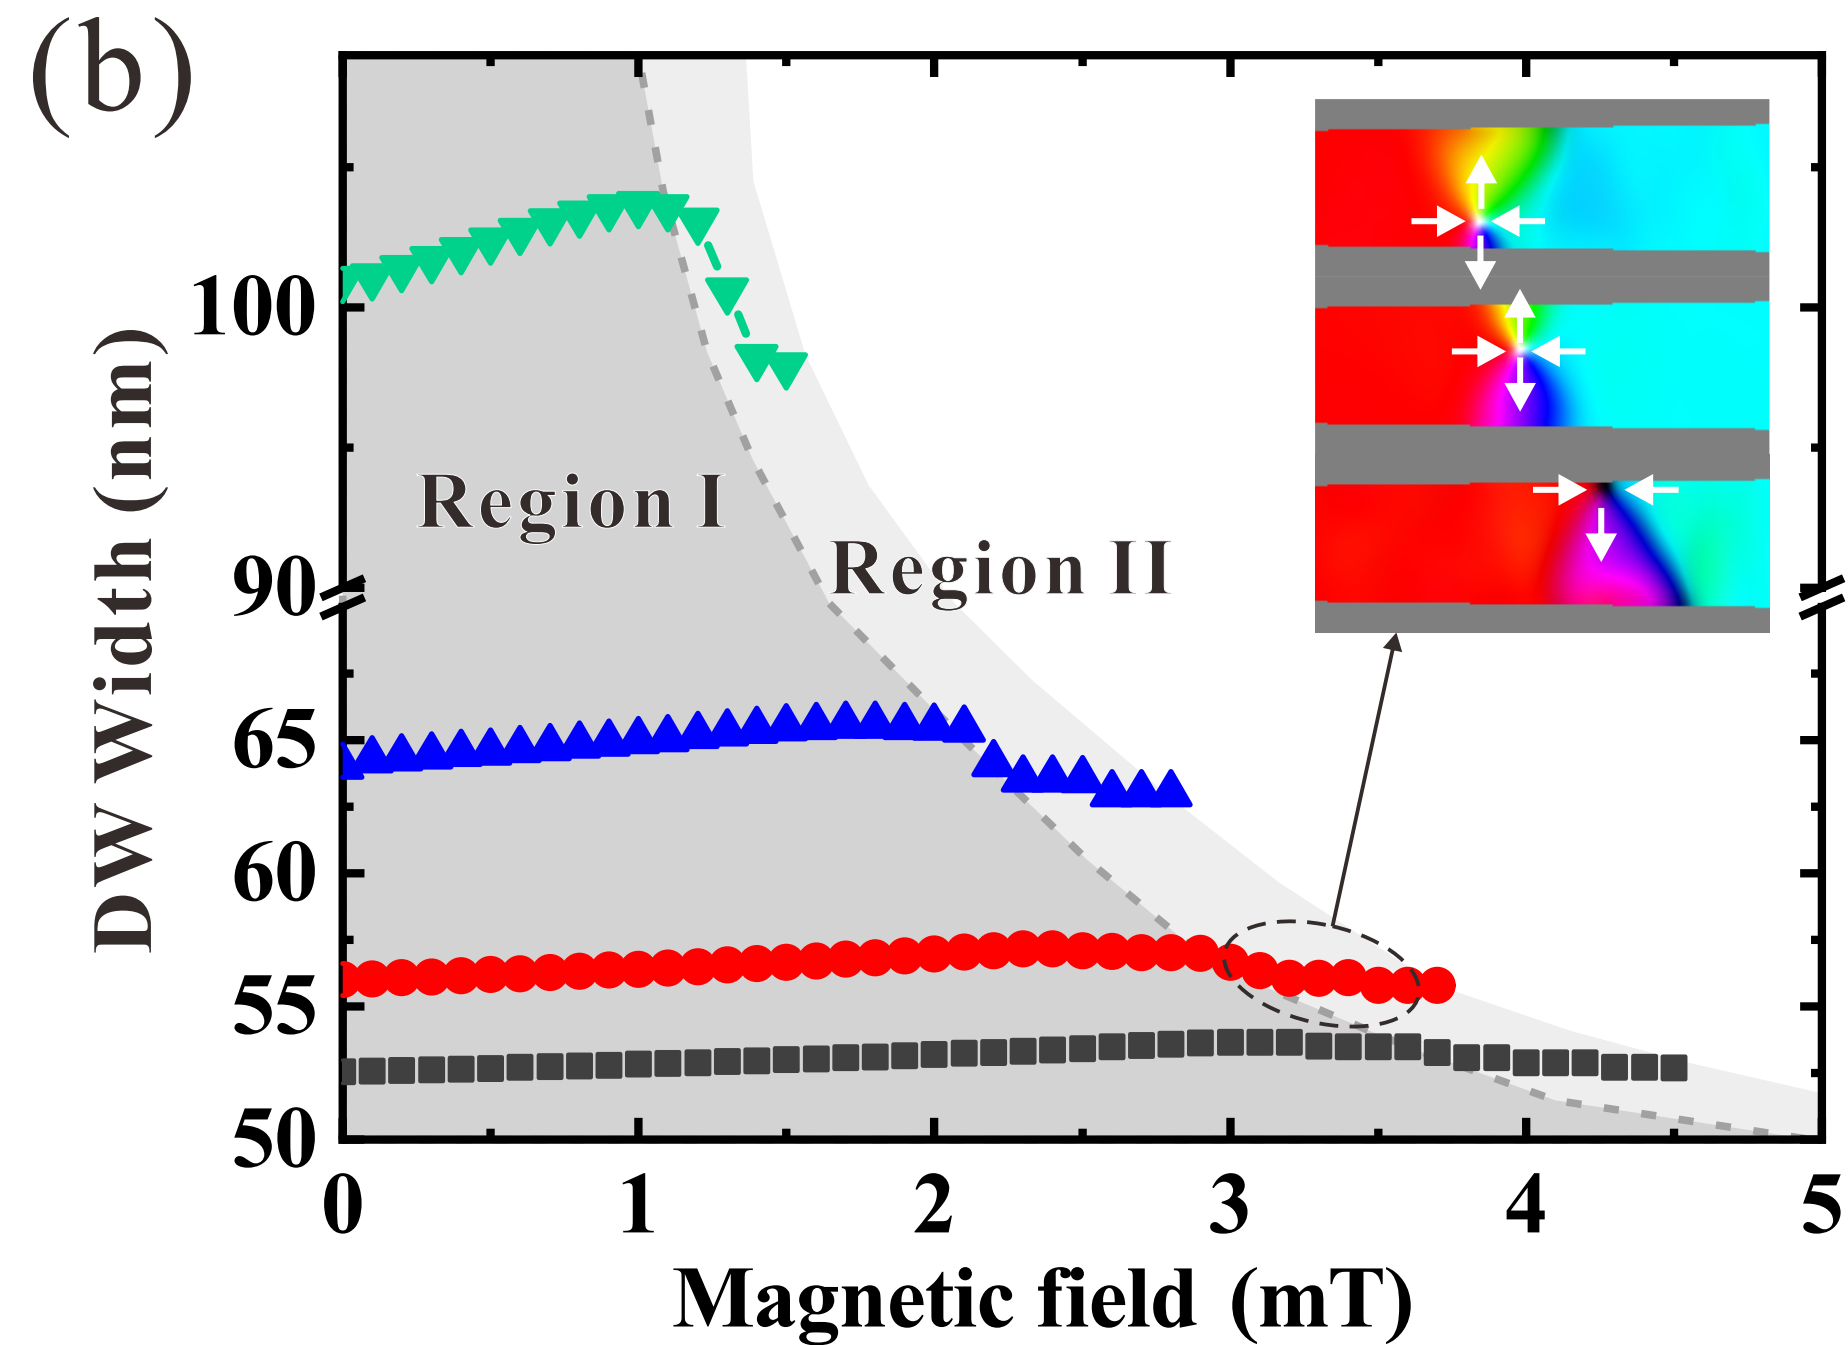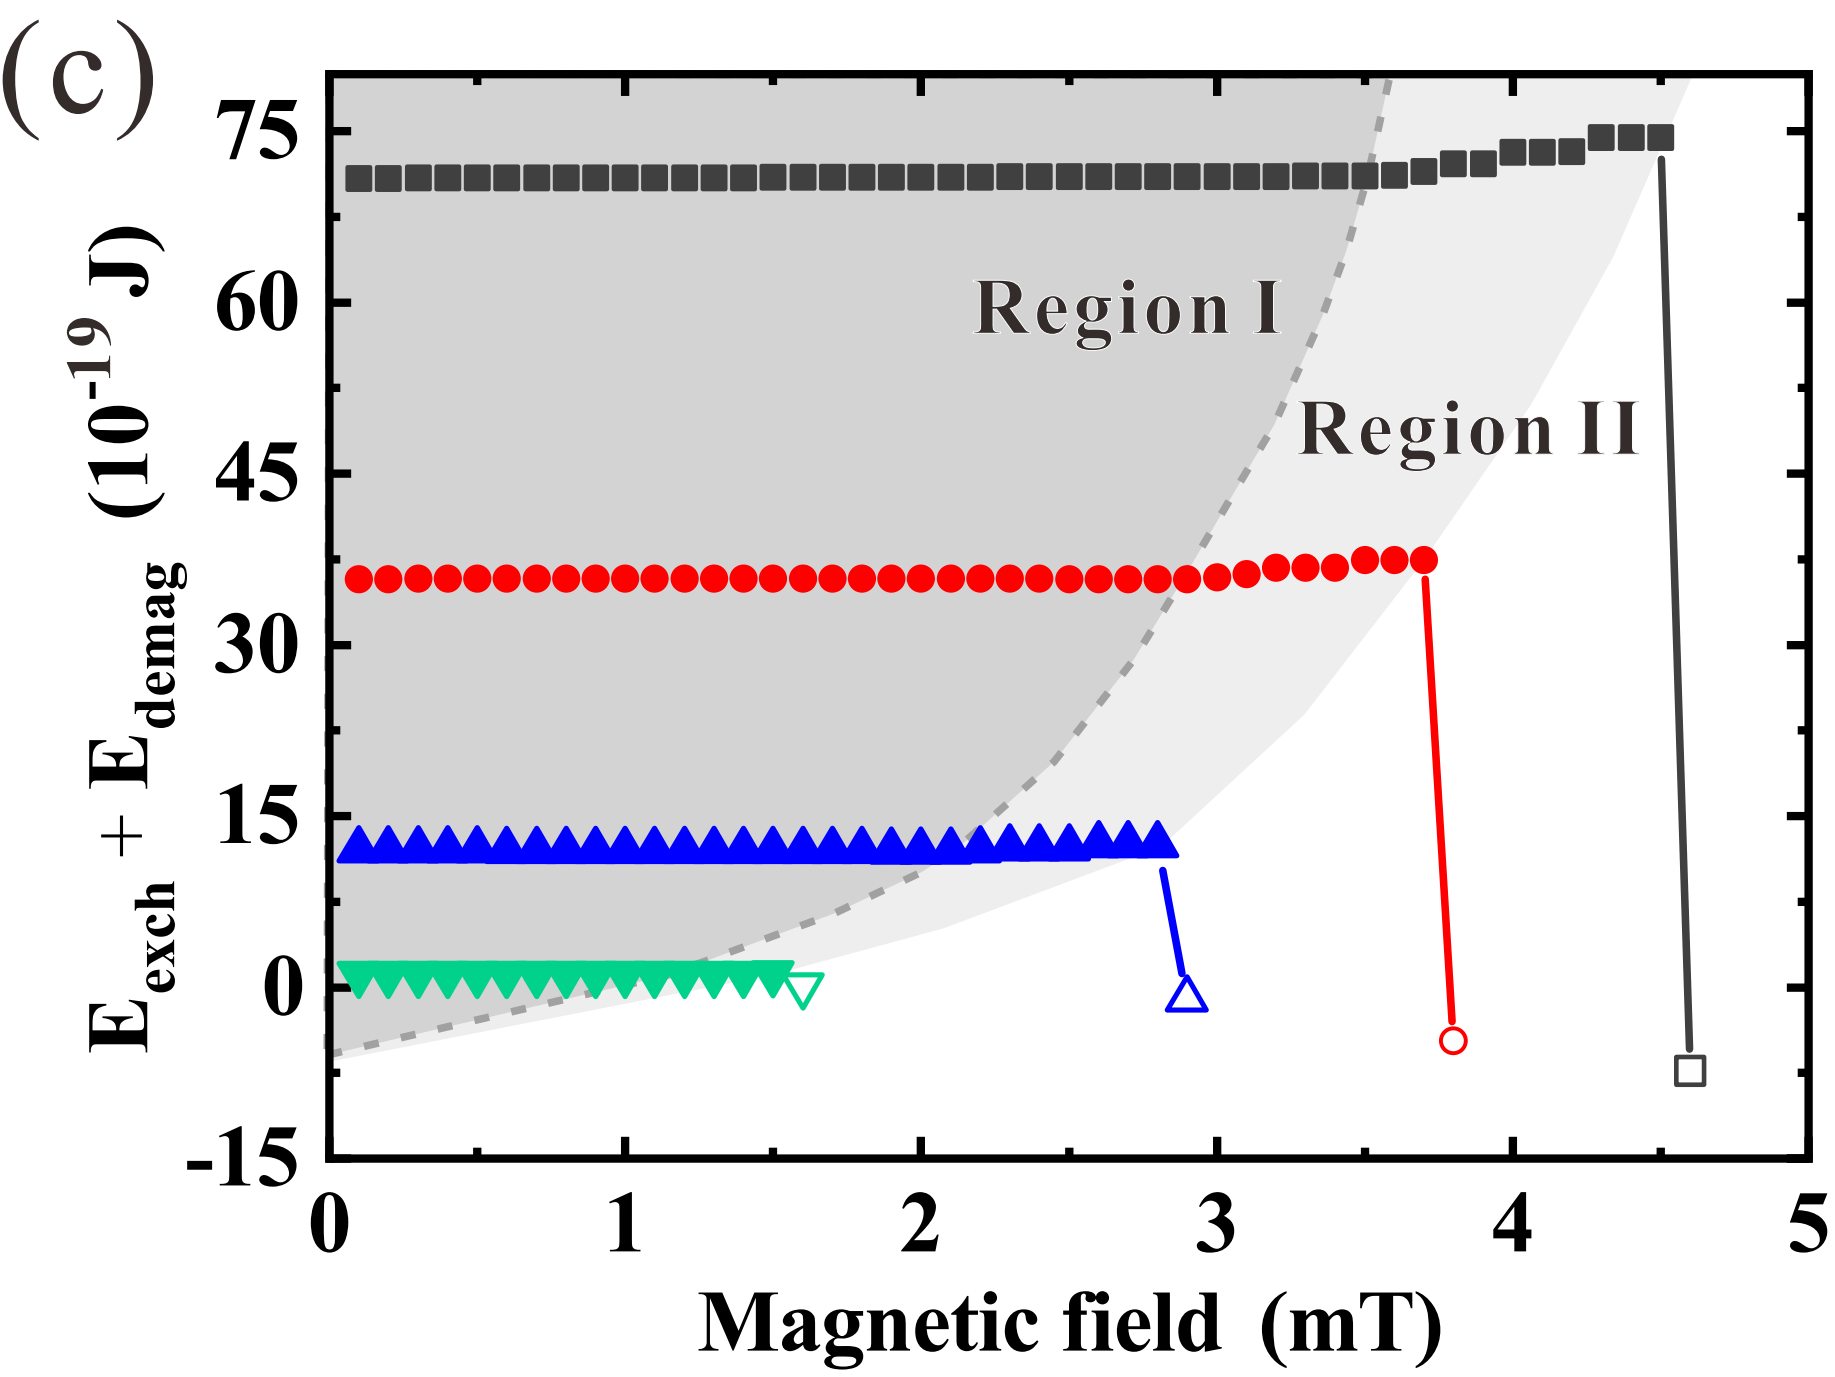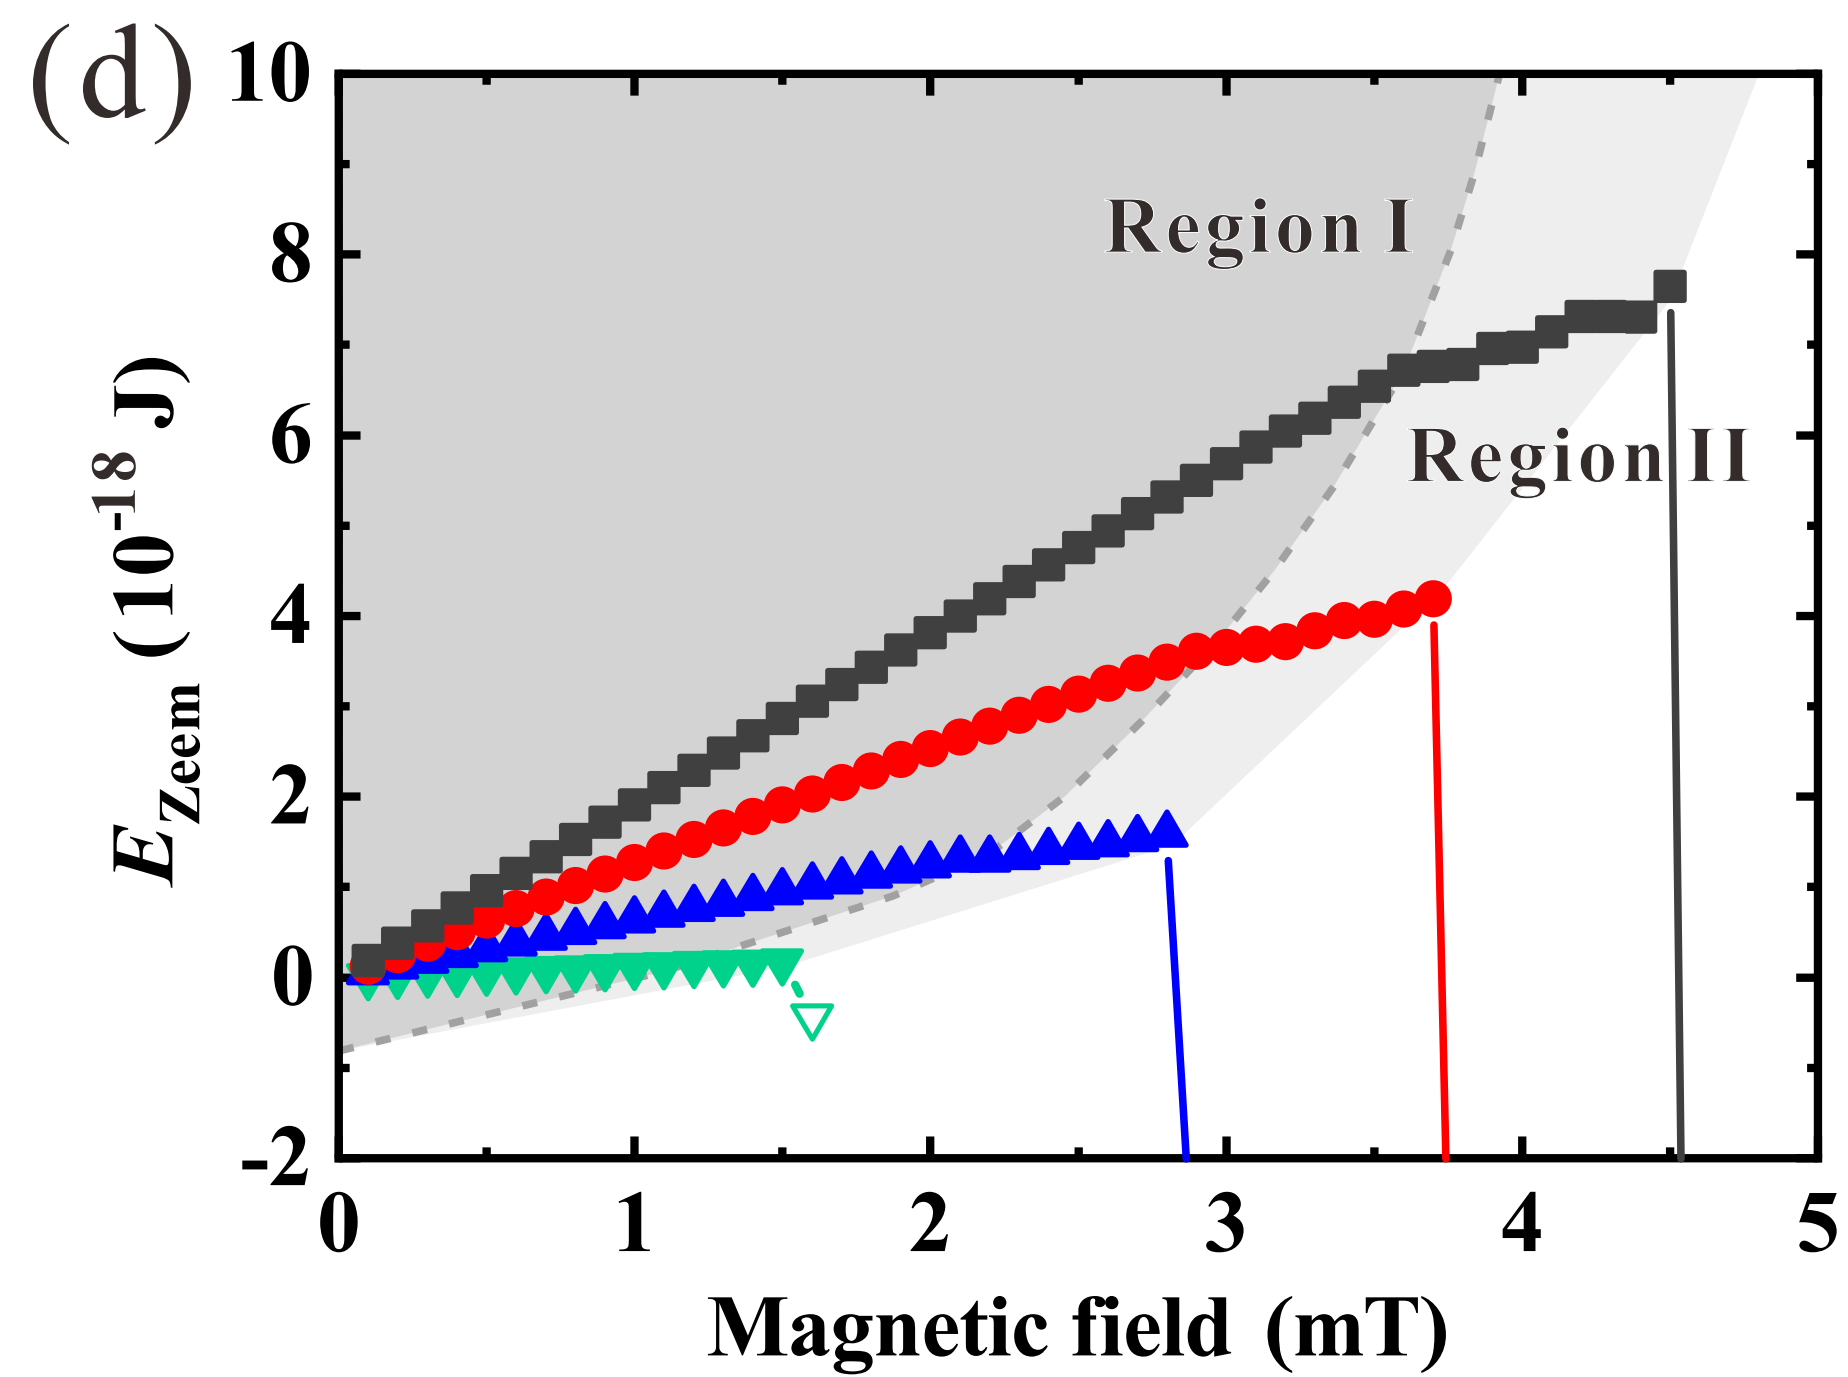

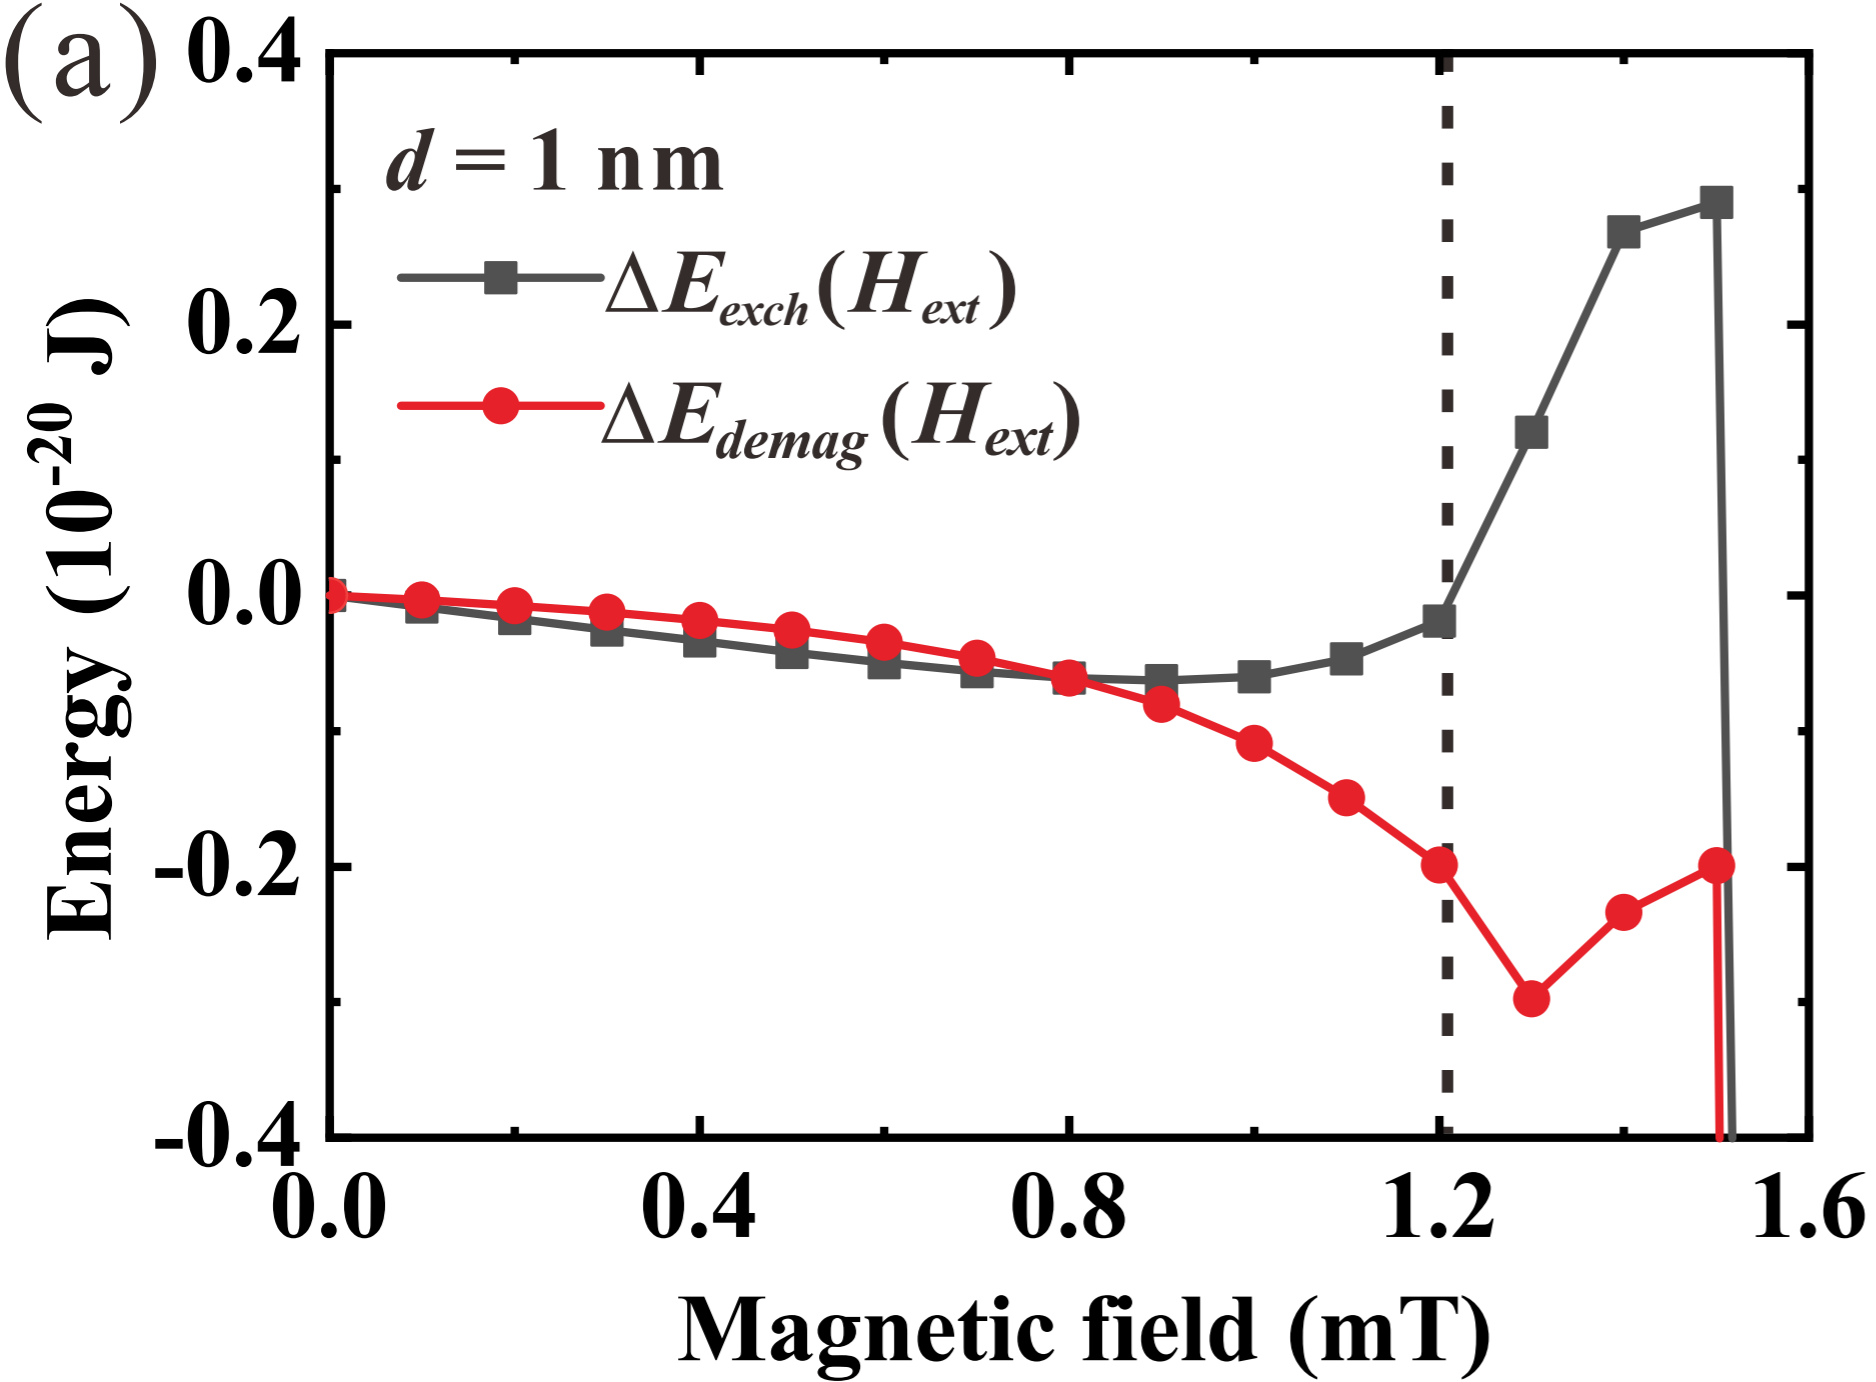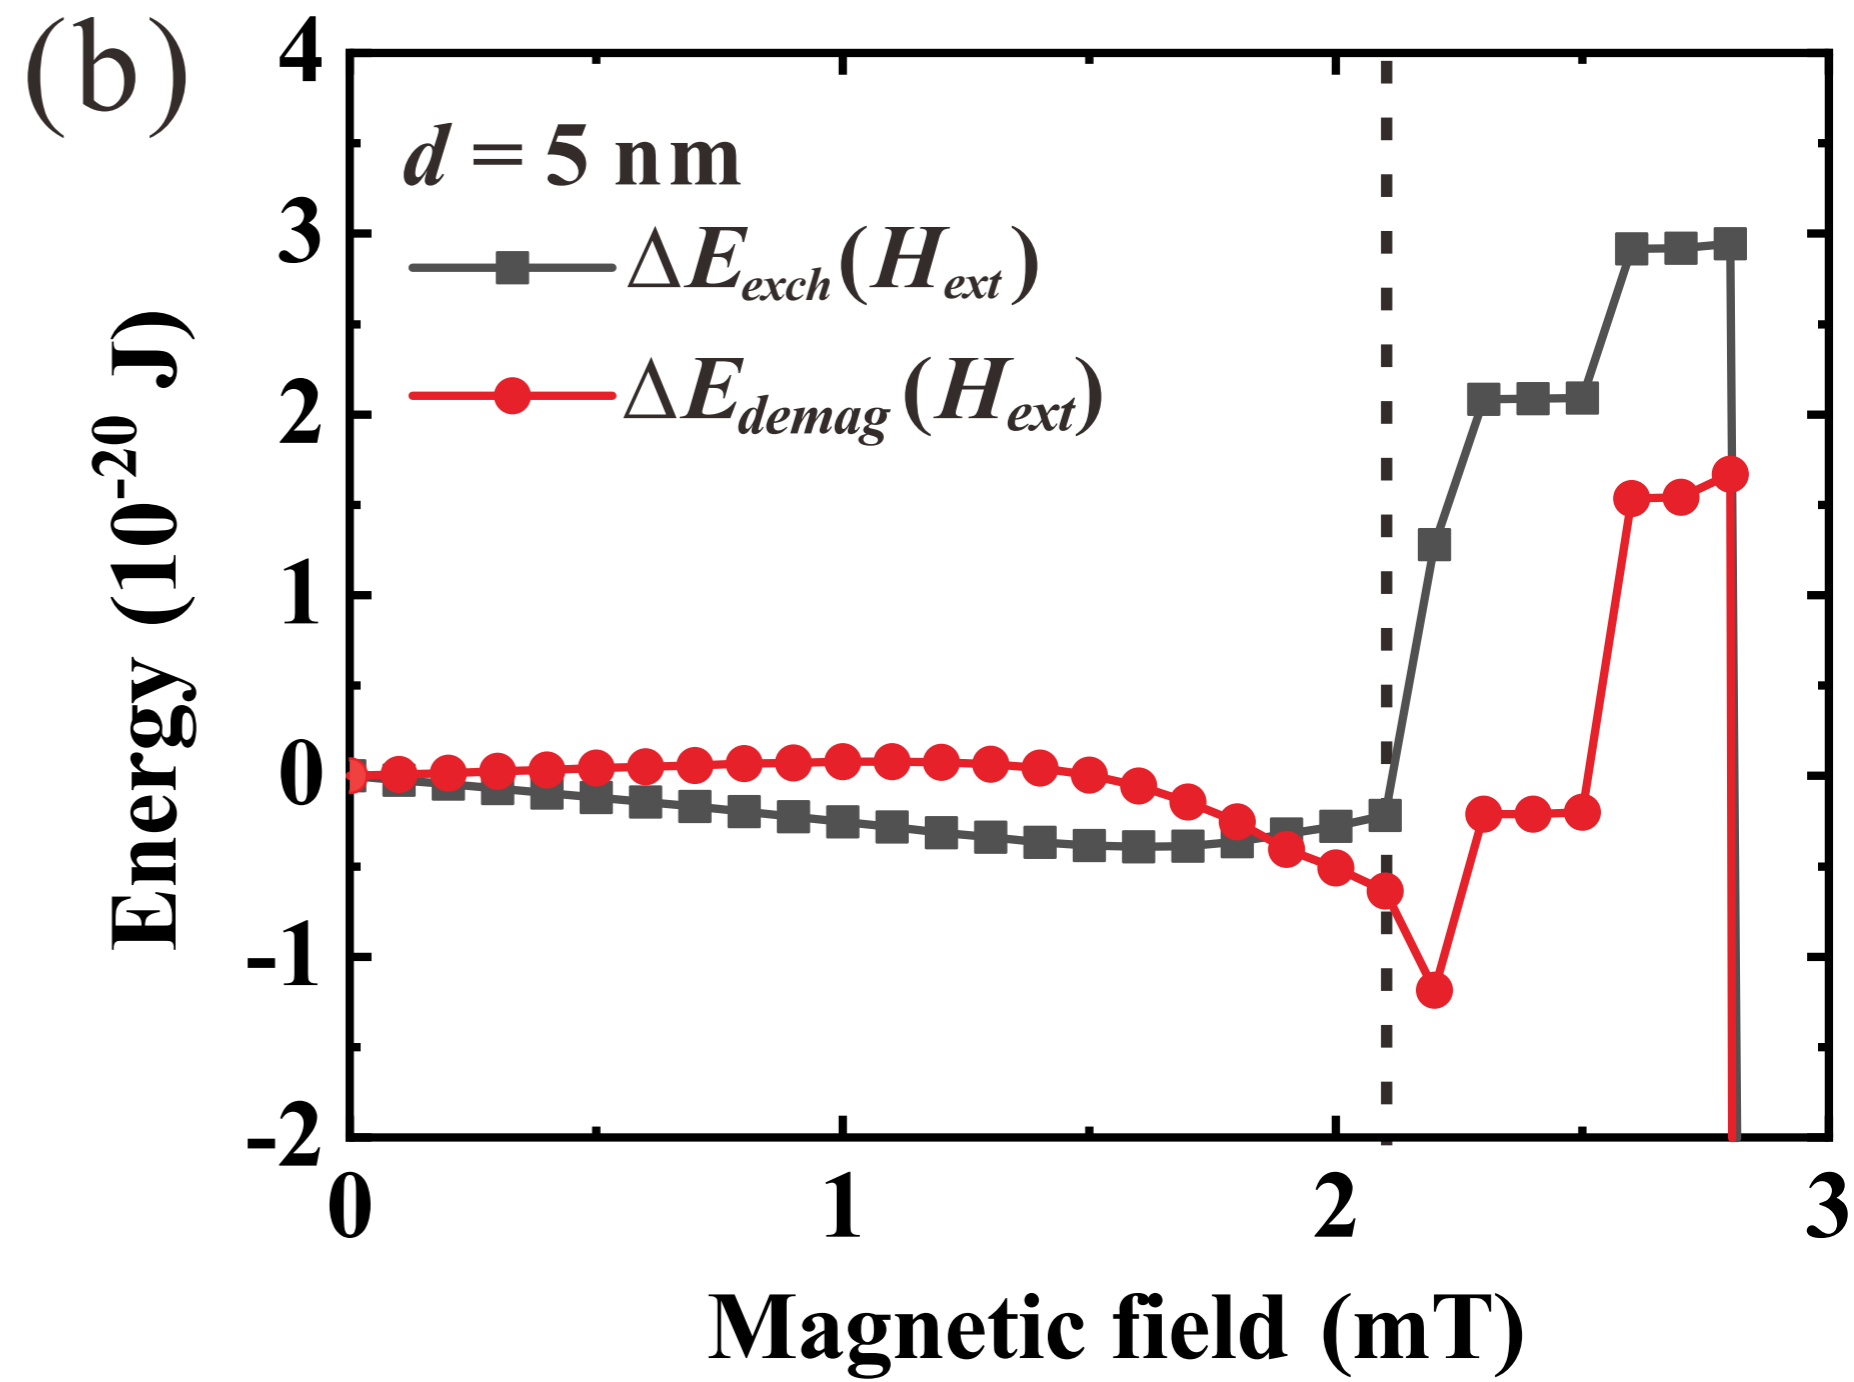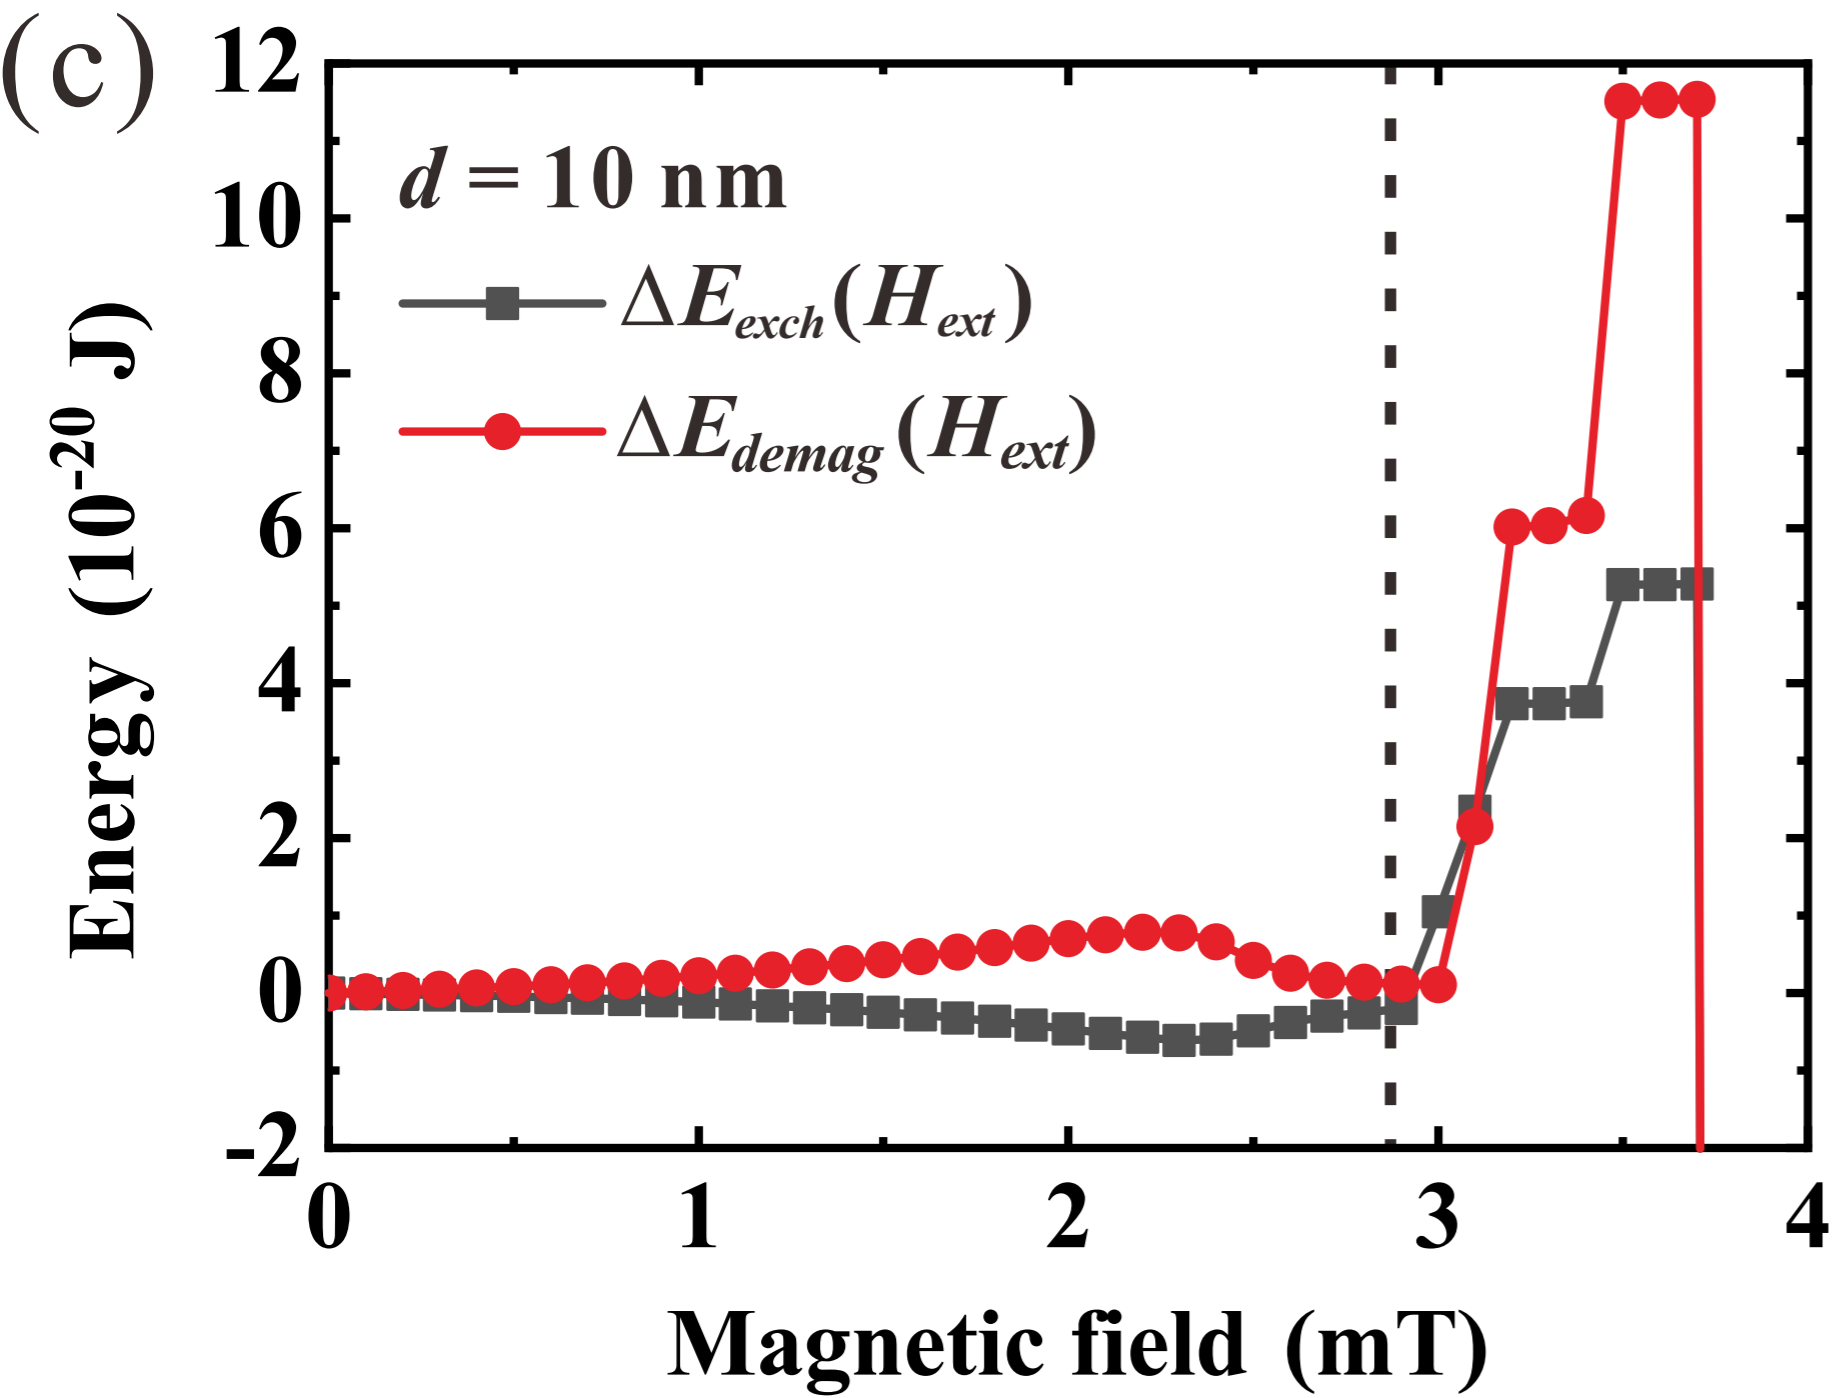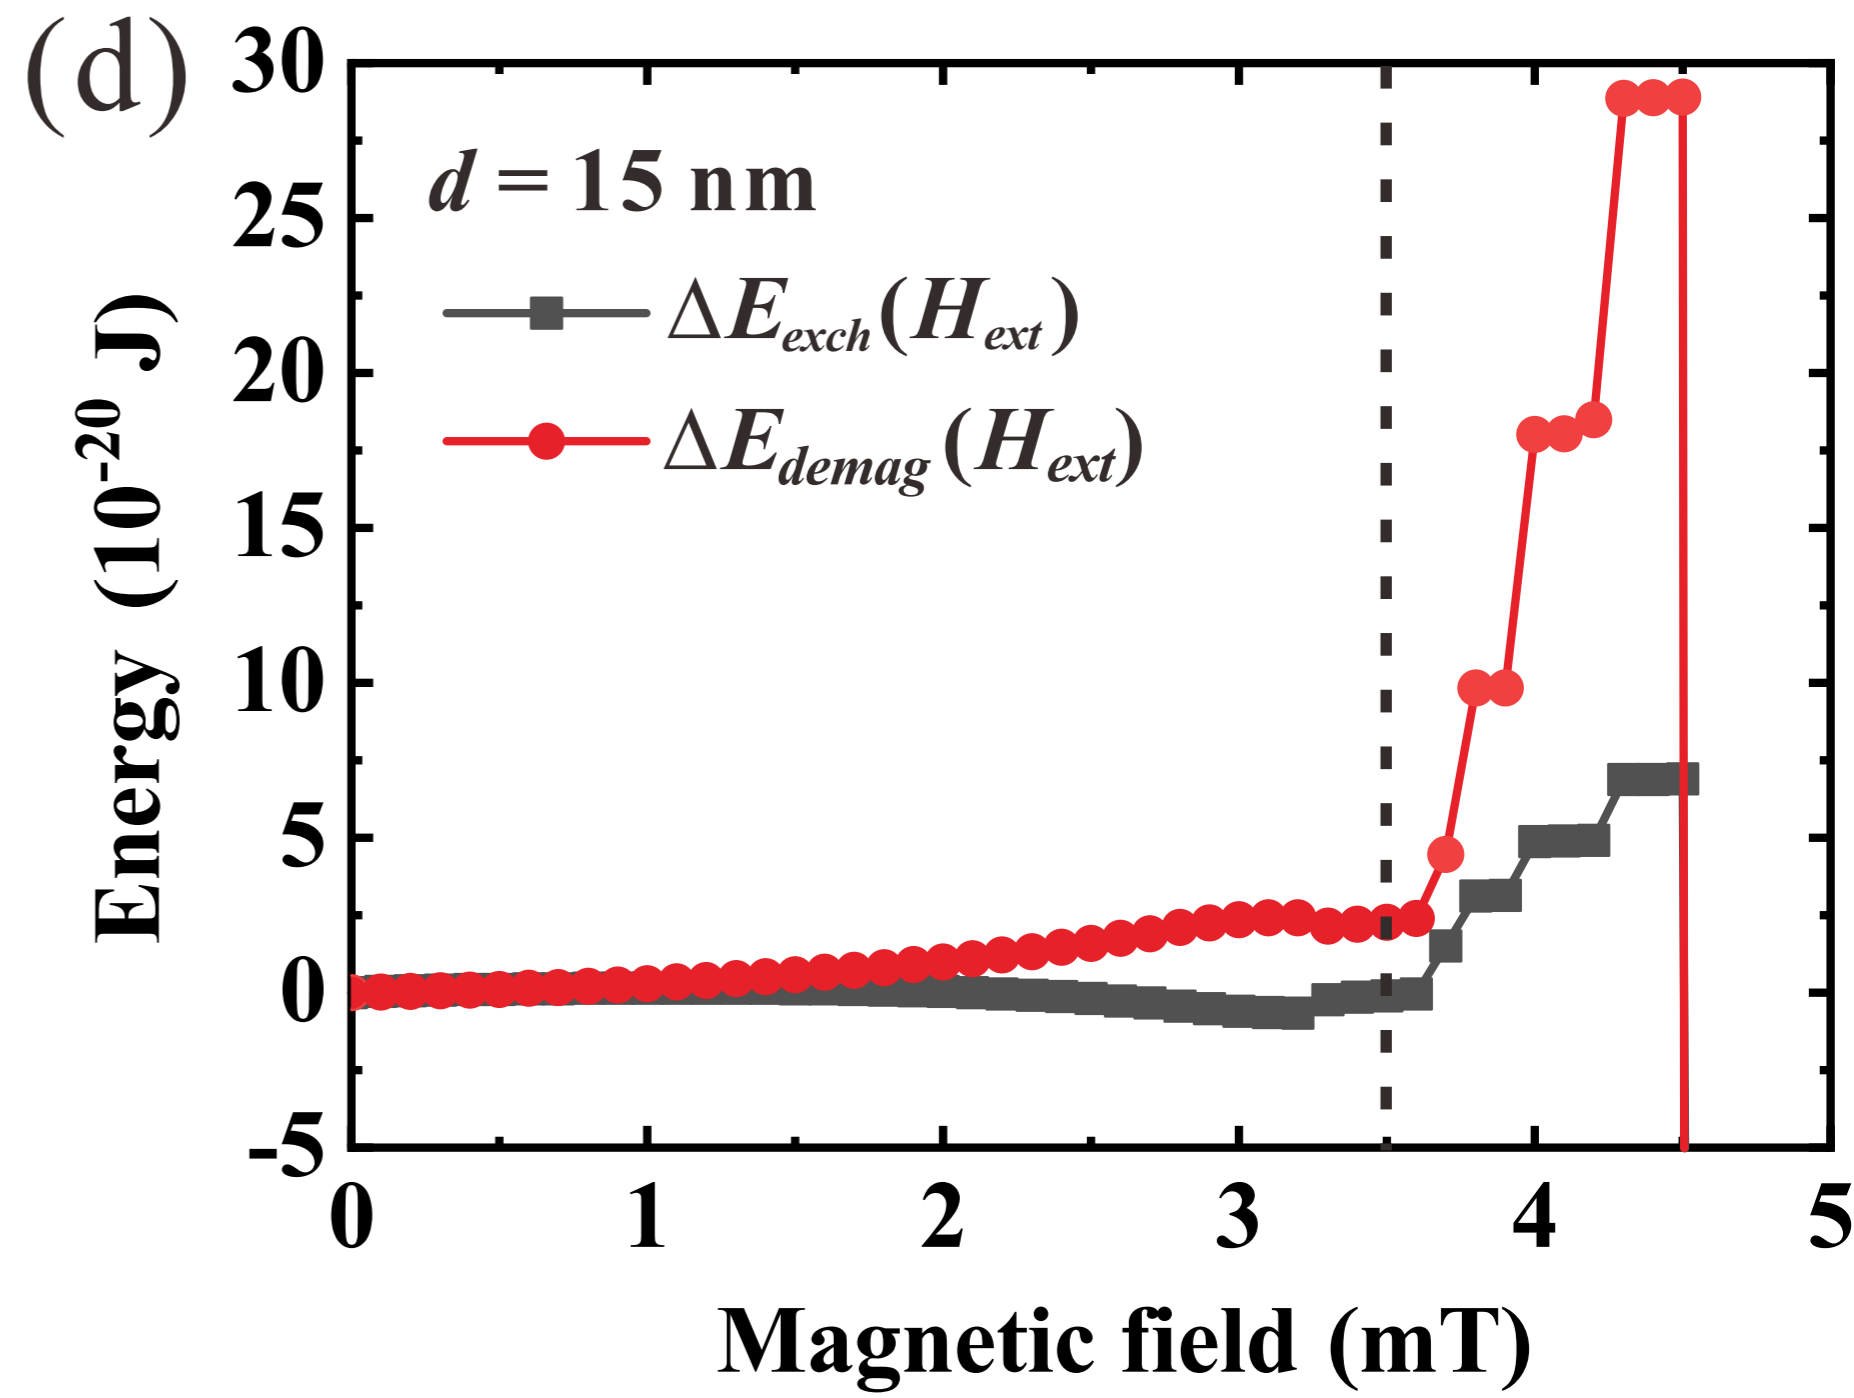

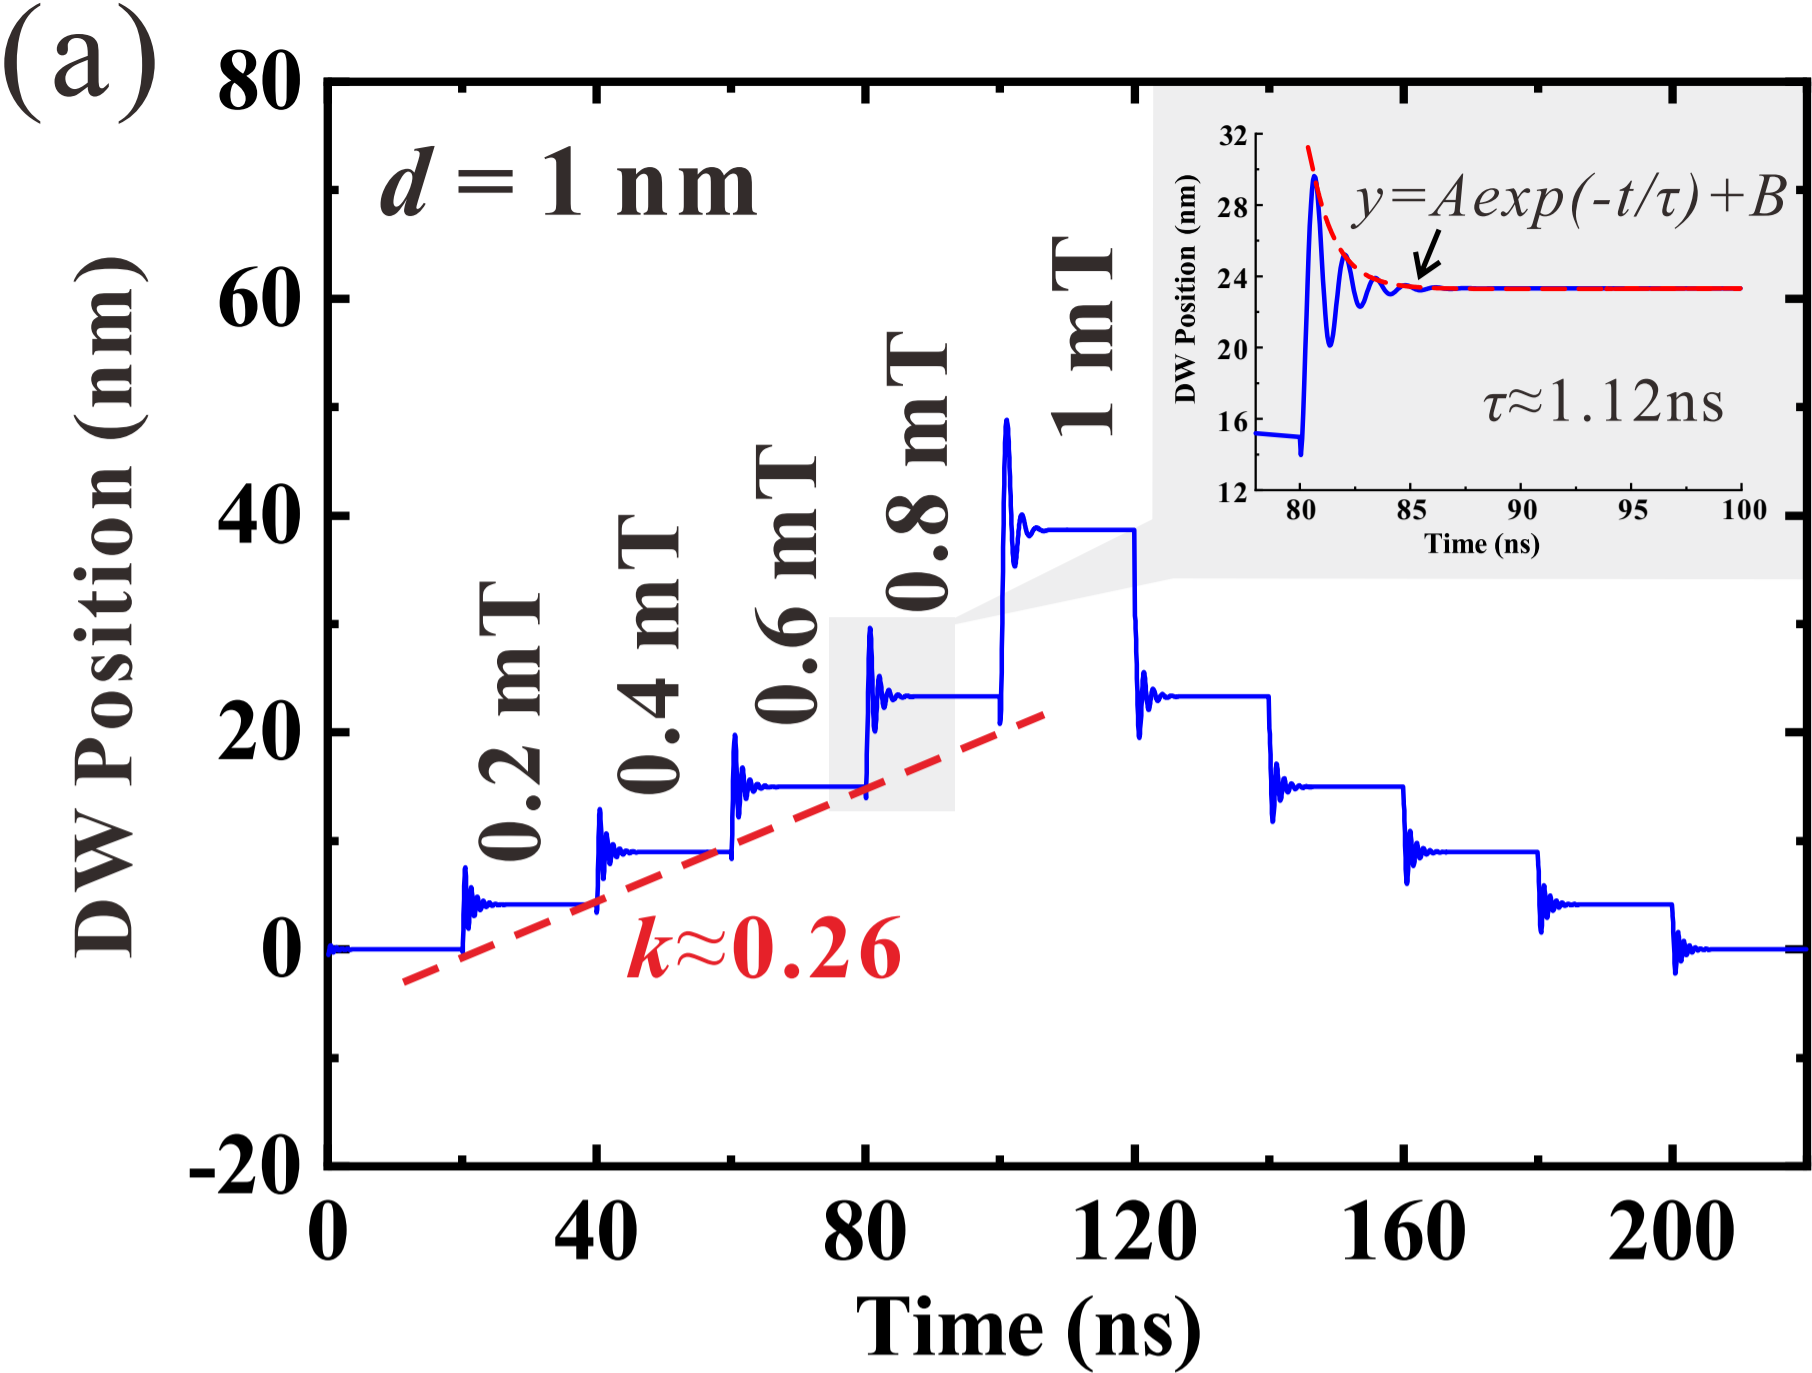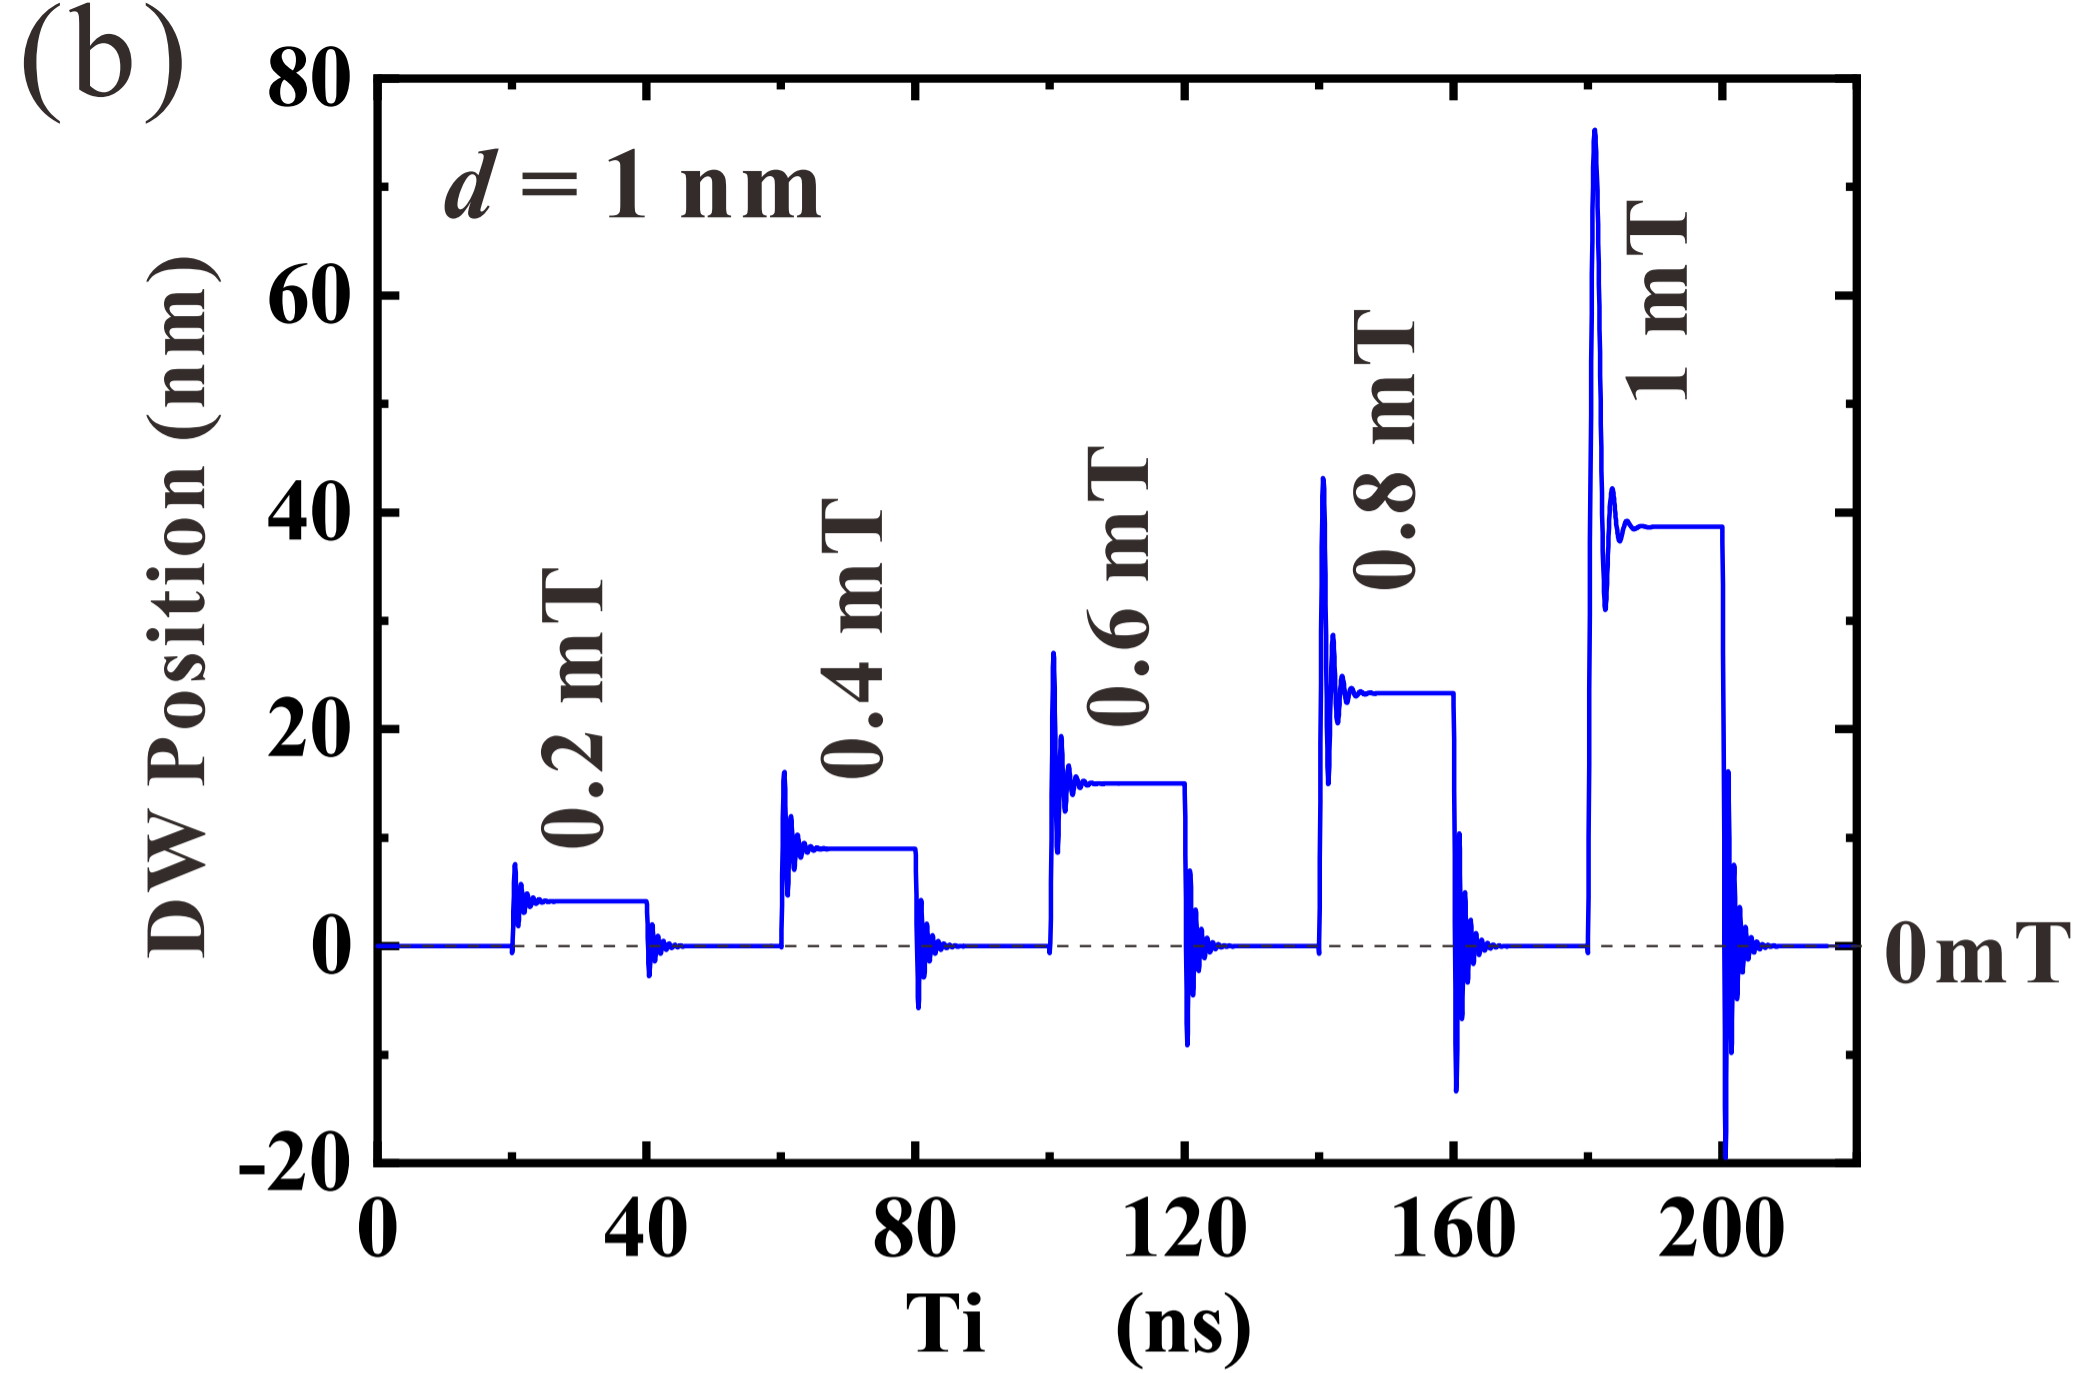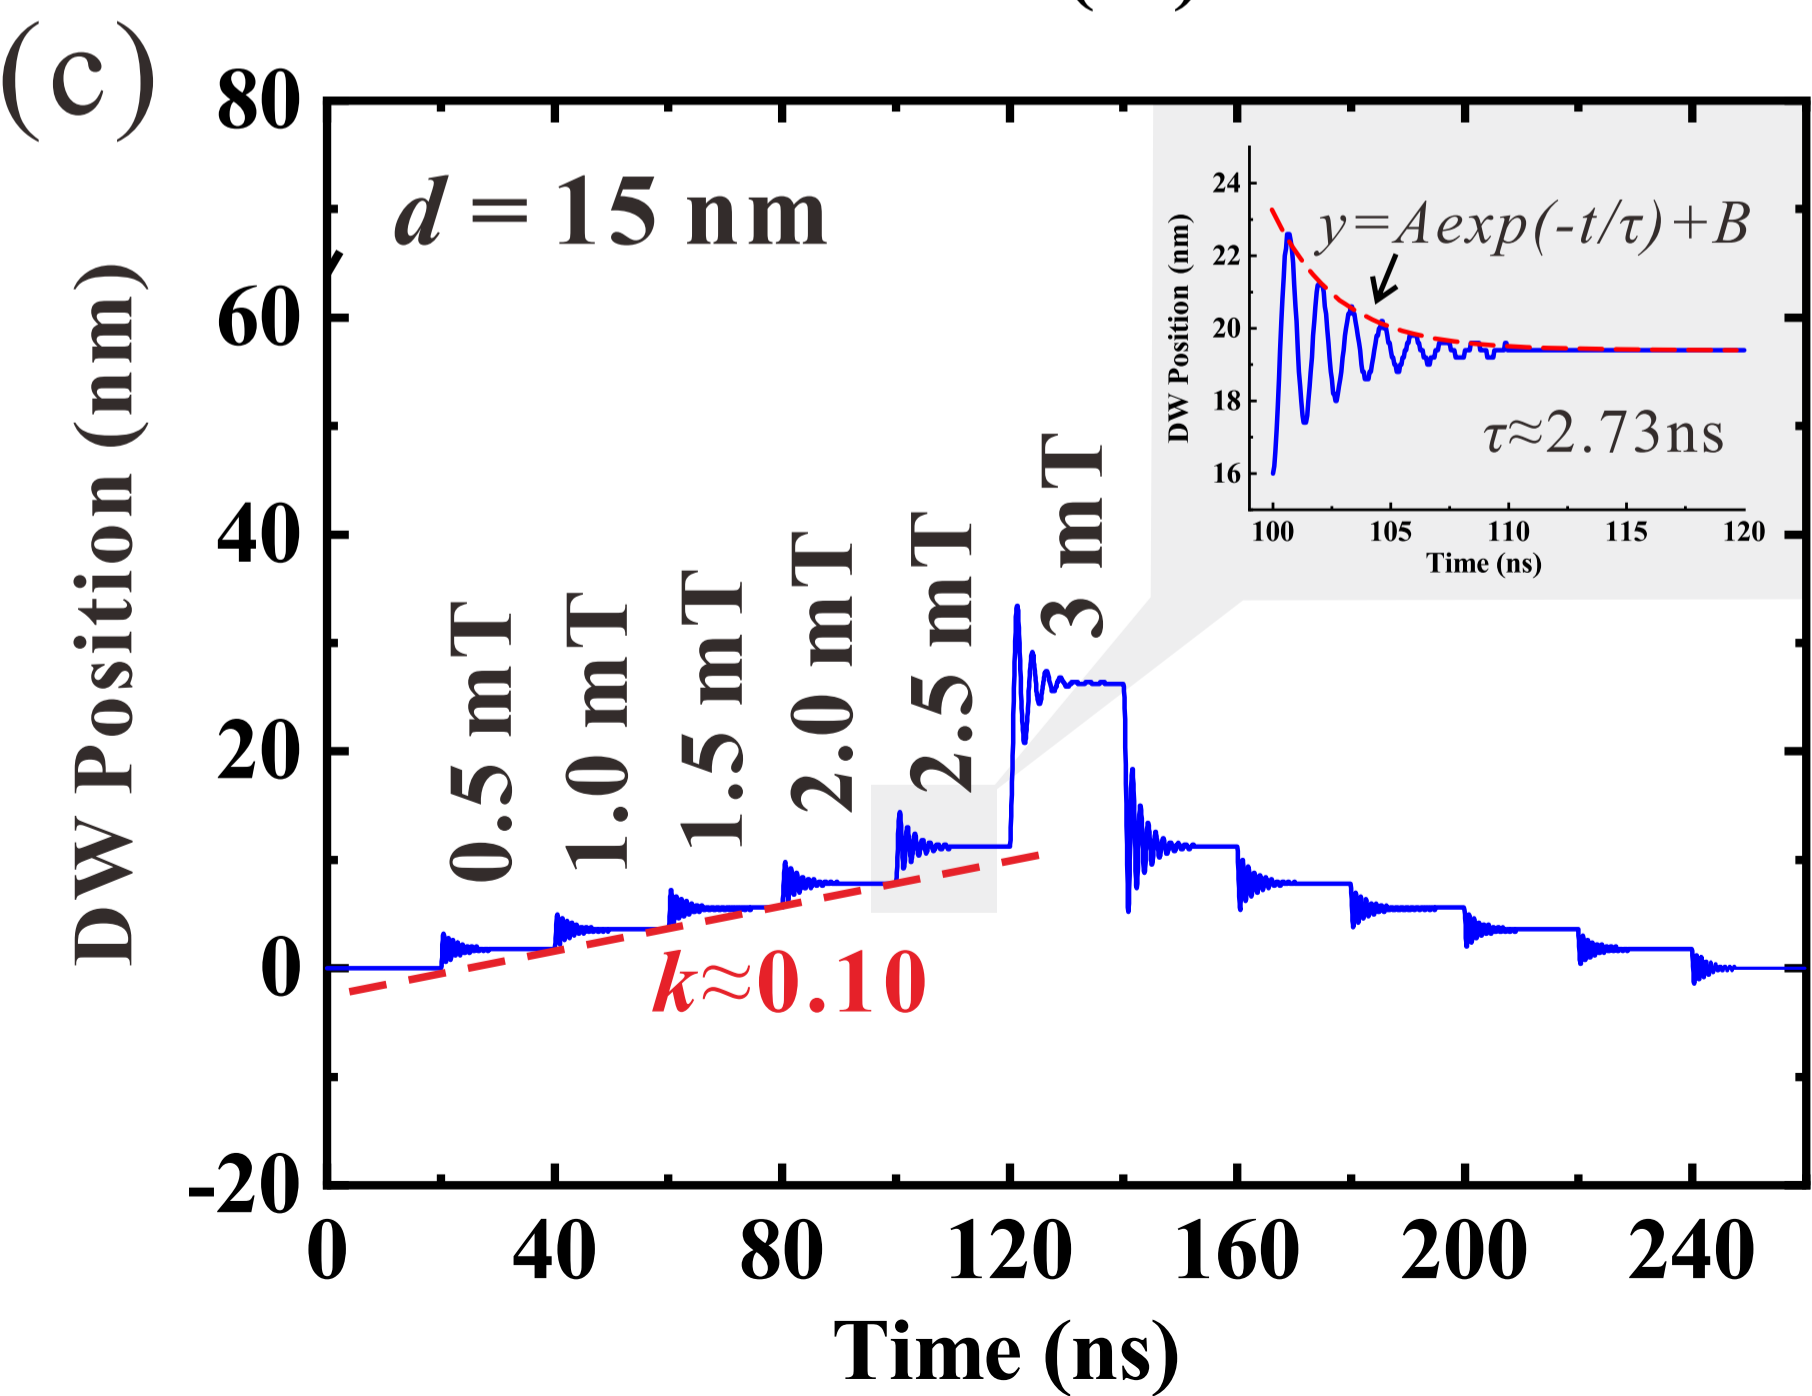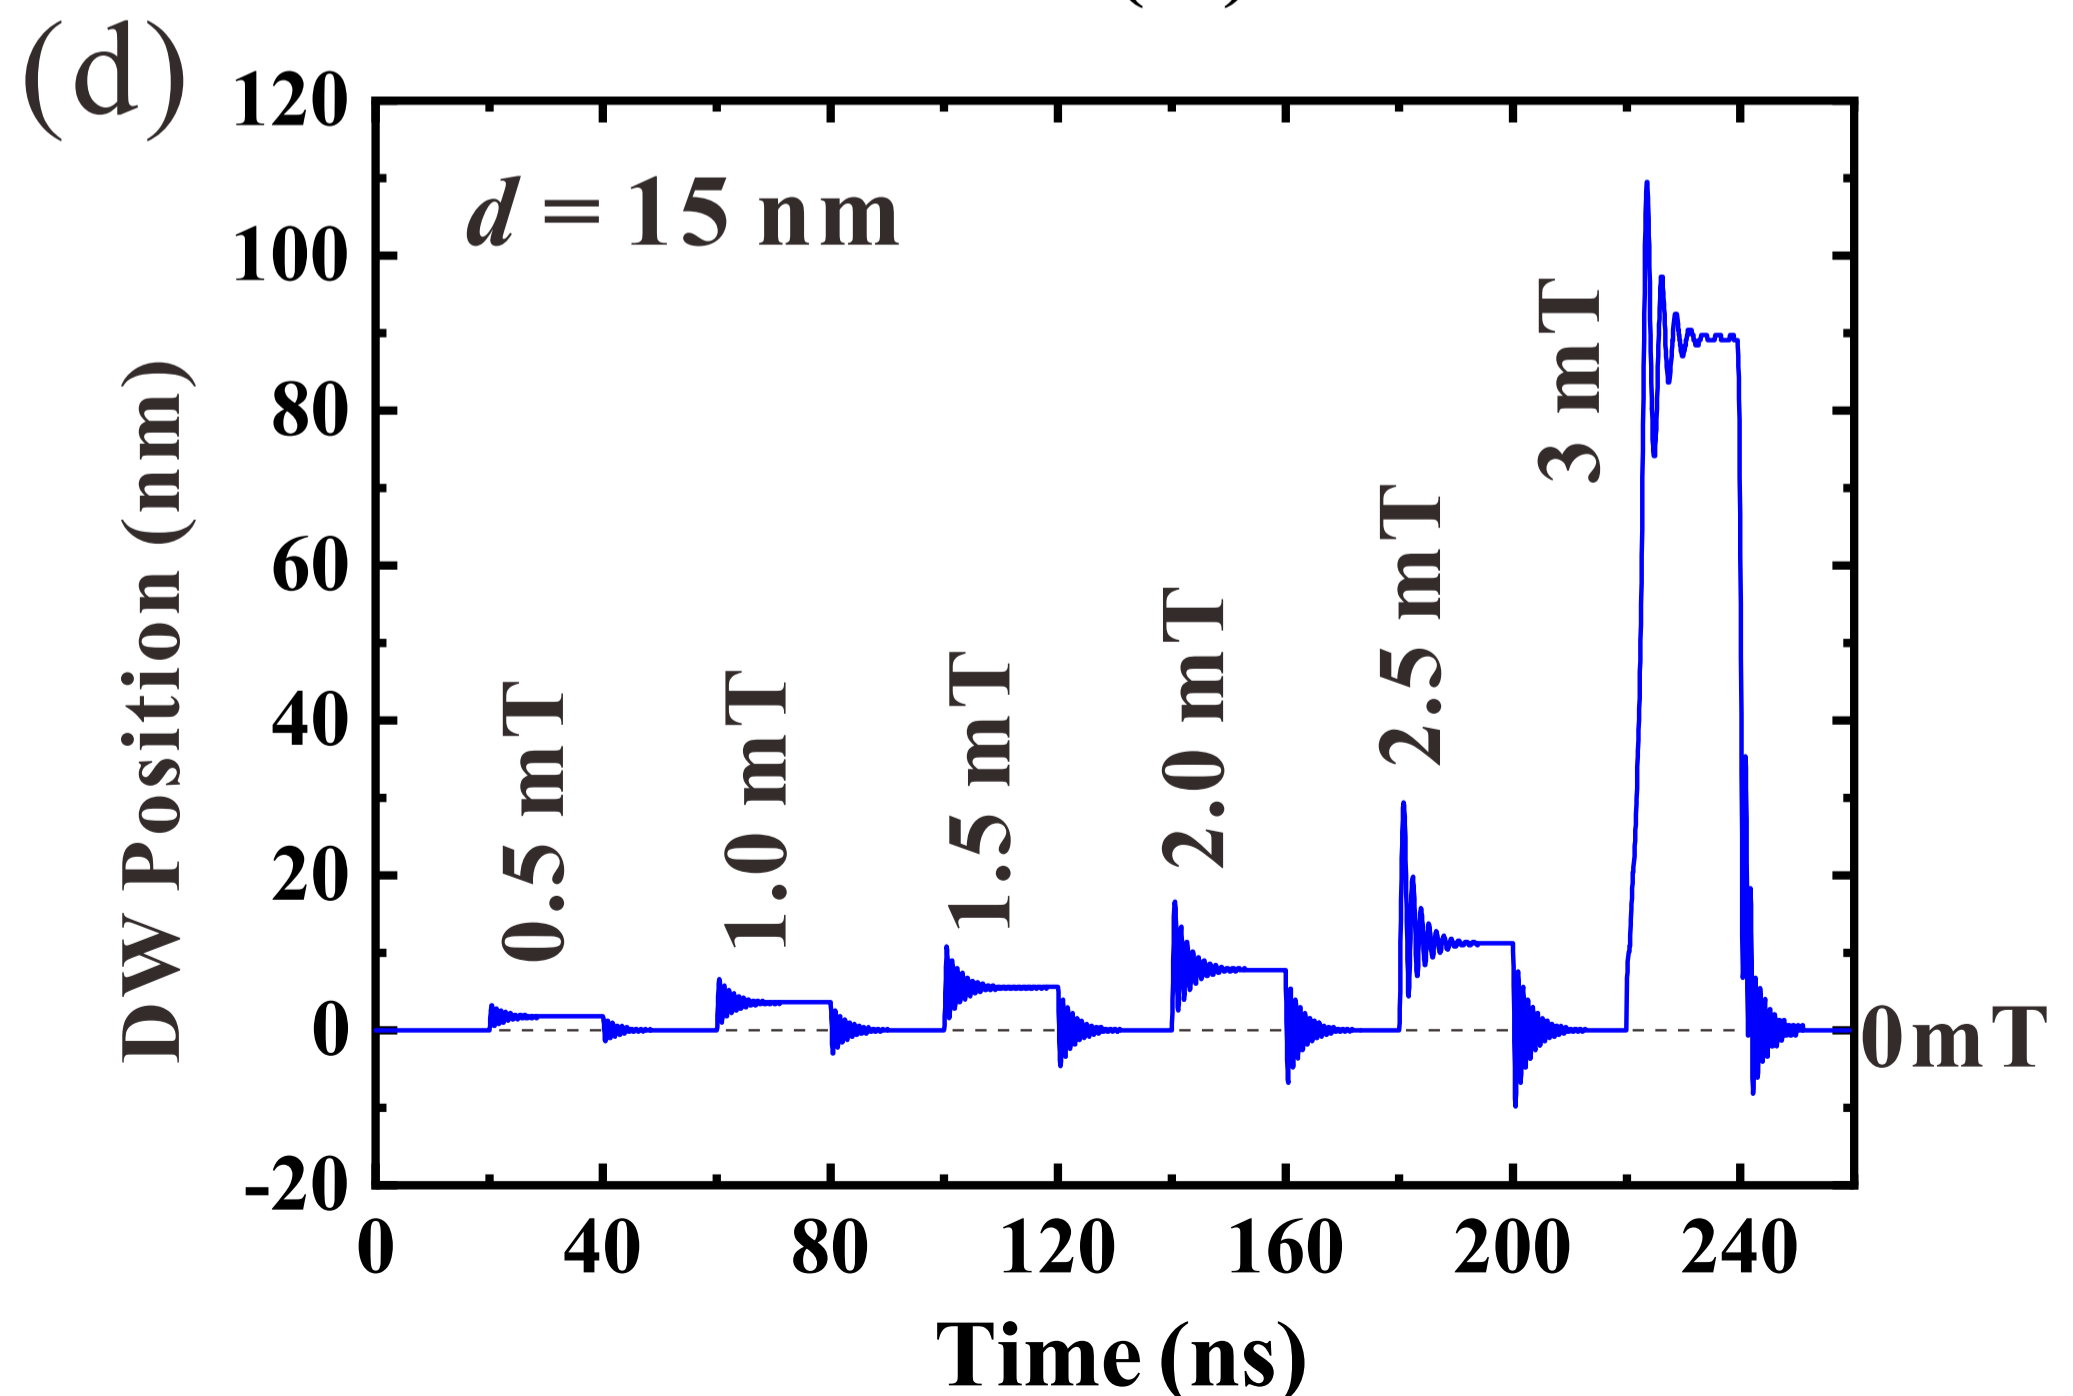

Supplement: d4cp01262c1.pdf [file d4cp01262c1.pdf]
